# Supplementary material
Source: MDPI journal article supplement (https://www.mdpi.com/2075-163X/11/3/266)
Supplement: s1 [file s1]

**Table S1.** Contents of major (wt.%) elements in pyroxenes and amphiboles of the magmatic rocks of Kuranakh, Elikchan and Istekh ore fields

| massif                         | Kuranakh massif           |                   |                            |                           |       |                   |                   | Elikchan massif           |        |                     |       | Istekh massif             |                  |                  | Dikes and fractured bodies |                 |        |       |
|--------------------------------|---------------------------|-------------------|----------------------------|---------------------------|-------|-------------------|-------------------|---------------------------|--------|---------------------|-------|---------------------------|------------------|------------------|----------------------------|-----------------|--------|-------|
| Rock                           | amphibole-biotite granite |                   |                            |                           |       |                   |                   | Granodiorite              |        |                     |       | amphibole-biotite granite | granodiorite     | Granophyry       | trachydolerite             |                 |        |       |
| Mineral                        | magne-sian augite         | subcal-cic augite | magnesio-ferri-horn-blende | magnesio-ferro-hornblende |       | magnesi-an augite | Subcal-cic augite | magnesio-ferro-hornblende |        | ferro—tscher-makite |       | magnesio-ferro-hornblende | magnesian augite | subcalcic augite | diopside -augite           | ferro-pargasite |        |       |
| Sample                         | 1213/2                    |                   |                            |                           |       |                   |                   | O212/9                    |        | O196/12             |       | K27/11                    | T704/1           |                  | T640                       |                 | T639/6 |       |
| SiO <sub>2</sub>               | 51.50                     | 51.46             | 49.80                      | 47.43                     | 47.83 | 48.43             | 50.85             | 52.27                     | 51.07  | 47.45               | 50.89 | 40.02                     | 50.56            | 52.88            | 52.17                      | 53.45           | 50.85  | 41.13 |
| TiO <sub>2</sub>               | 0.42                      | 0.40              | 0.94                       | 1.09                      | 1.19  | 1.25              | 0.70              | 0.33                      | 0.45   | 0.79                | 0.23  | 0.28                      | 0.46             | 0.75             | 0.61                       | 0.17            | 0.70   | 0.46  |
| Al <sub>2</sub> O <sub>3</sub> | 2.45                      | 2.69              | 4.19                       | 4.96                      | 5.50  | 6.25              | 2.54              | 2.98                      | 5.32   | 8.68                | 4.56  | 13.05                     | 2.98             | 1.56             | 5.11                       | 2.25            | 2.54   | 17.25 |
| Cr <sub>2</sub> O <sub>3</sub> | 0.47                      | 0.09              | 0                          | 0                         | 0     | 0.15              | 0.05              | 0                         | 0      | 0.02                | 0.01  | 0.01                      | 0.09             | 0.06             | 0.97                       | 0.05            | 0.05   | 0.03  |
| Fe <sub>2</sub> O <sub>3</sub> | 4.82                      | 3.14              | 8.59                       | 0.28                      | 4.50  | 3.76              | 5.08              | 0                         | 3.49   | 4.85                | 5.39  | 6.37                      | 2.50             | 1.25             | 0                          | 0               | 5.08   | 0     |
| FeO                            | 0.73                      | 10.84             | 5.24                       | 14.87                     | 11.00 | 11.99             | 3.76              | 13.45                     | 9.80   | 10.69               | 6.73  | 21.68                     | 12.47            | 6.53             | 4.57                       | 18.30           | 3.76   | 13.93 |
| MnO                            | 0.15                      | 0.48              | 0.38                       | 0.59                      | 0.52  | 0.48              | 0.30              | 0.48                      | 0.55   | 0.71                | 0.38  | 0.24                      | 0.97             | 0.16             | 0.17                       | 0.25            | 0.30   | 0.45  |
| MgO                            | 17.90                     | 17.46             | 14.31                      | 14.37                     | 13.56 | 12.83             | 16.14             | 16.27                     | 15.18  | 12.47               | 18.22 | 2.80                      | 13.67            | 14.08            | 16.83                      | 13.88           | 16.14  | 8.19  |
| CaO                            | 21.20                     | 11.90             | 14.24                      | 11.31                     | 11.32 | 11.29             | 20.90             | 11.75                     | 10.75  | 11.28               | 9.87  | 10.52                     | 11.26            | 21.11            | 19.96                      | 11.22           | 20.90  | 12.85 |
| Na <sub>2</sub> O              | 0.36                      | 0.82              | 0.93                       | 1.44                      | 1.50  | 1.42              | 0.25              | 0.84                      | 1.14   | 1.53                | 0.44  | 1.32                      | 0.73             | 0.96             | 0.39                       | 0.71            | 0.25   | 1.95  |
| K <sub>2</sub> O               | 0                         | 0.24              | 0.33                       | 0.62                      | 0.64  | 0.72              | 0.01              | 0.24                      | 0.13   | 0.13                | 0     | 0.50                      | 0.32             | 0                | 0                          | 0.17            | 0.01   | 0.25  |
| H <sub>2</sub> O               | -                         | -                 | 2.04                       | 1.86                      | 2.02  | 2.03              | -                 | -                         | 1.81   | 1.97                | 2.06  | 10.81                     | 1.76             | -                | -                          | -               | -      | 1.89  |
| F                              | -                         | 0.25              | -                          | 0.20                      | 0.29  | -                 | 0.15              | 0.09                      | 0.53   | 0.10                | 0.20  | 0.05                      | 0.34             | -                | 0.13                       | 0.17            | 0.15   | 0     |
| Cl                             | -                         | 0.04              | -                          | 0.20                      | 0.10  | -                 | 0                 | 0.04                      | 0.04   | 0.12                | 0.01  | 0.17                      | 0.32             | 0.19             | 0                          | 0.23            | 0      | 0.40  |
| Σ                              | 99.96                     | 99.75             | 100.99                     | 99.22                     | 99.58 | 100.54            | 100.73            | 98.74                     | 100.26 | 100.79              | 98.99 | 98.82                     | 98.43            | 99.42            | 100.9                      | 100.63          | 100.73 | 98.78 |
| Si                             | 1.88                      | 1.92              | 7.14                       | 7.09                      | 7.13  | 7.06              | 1.87              | 1.96                      | 7.33   | 6.88                | 7.30  | 6.30                      | 7.53             | 1.97             | 1.88                       | 1.98            | 1.87   | 6.16  |
| Al <sup>4+</sup>               | 0.11                      | 0.08              | 0.7                        | 0.87                      | 0.87  | 0.94              | 0.1               | 0.04                      | 0.67   | 1.12                | 0.70  | 1.70                      | 0.47             | 0.03             | 0.12                       | 0.02            | 0.11   | 1.84  |
| Al <sup>6+</sup>               | 0                         | 0.03              | 0                          | 0                         | 0.03  | 0.14              | 0                 | 0.09                      | 0.23   | 0.36                | 0.07  | 0.78                      | 0.05             | 0.04             | 0.09                       | 0.07            | 0      | 1.21  |
| Ti                             | 0.01                      | 0.01              | 0.1                        | 0.12                      | 0.13  | 0.14              | 0.02              | 0.01                      | 0.05   | 0.09                | 0.02  | 0.03                      | 0.05             | 0.02             | 0.02                       | 0.01            | 0.02   | 0.05  |
| Fe <sup>3+</sup>               | 0.13                      | 0.09              | 0.93                       | 0.03                      | 0.18  | 0.37              | 0.14              | 0                         | 0.38   | 0.53                | 0.58  | 0.76                      | 0.28             | 0.04             | 0.                         | 0               | 0.14   | 0     |
| Fe <sup>2+</sup>               | 0.02                      | 0.34              | 0.63                       | 1.85                      | 1.70  | 1.52              | 0.12              | 0.43                      | 1.17   | 1.29                | 0.81  | 2.85                      | 1.55             | 0.20             | 0.16                       | 0.66            | 0.12   | 1.76  |
| Mn                             | 0.01                      | 0.02              | 0.05                       | 0.08                      | 0.07  | 0.06              | 0.01              | 0.02                      | 0.07   | 0.09                | 0.05  | 0.03                      | 0.12             | 0.01             | 0.01                       | 0.01            | 0.01   | 0.06  |
| Mg                             | 0.98                      | 0.98              | 3.06                       | 3.20                      | 3.01  | 2.79              | 0.89              | 0.91                      | 3.25   | 2.69                | 3.89  | 0.66                      | 3.03             | 0.78             | 0.90                       | 0.75            | 0.89   | 1.83  |
| Ca                             | 0.83                      | 0.47              | 2.19                       | 1.75                      | 1.8   | 1.81              | 0.82              | 0.47                      | 1.65   | 1.75                | 1.52  | 1.77                      | 1.80             | 0.85             | 0.77                       | 0.44            | 0.82   | 2.06  |
| Na                             | 0.02                      | 0.06              | 0.67                       | 0.42                      | 0.43  | 0.40              | 0.02              | 0.06                      | 0.32   | 0.43                | 0.12  | 0.40                      | 0.21             | 0.07             | 0.03                       | 0.05            | 0.02   | 0.57  |
| K                              | 0                         | 0.01              | 0.06                       | 0.12                      | 0.12  | 0.13              | 0                 | 0.01                      | 0.02   | 0.02                | 0     | 0.10                      | 0.06             | 0                | 0                          | 0.01            |        | 0.05  |
| OH                             |                           |                   | 1.99                       | 1.85                      | 1.84  | 1.99              |                   |                           | 1.75   | 1.92                | 1.99  | 1.93                      | 1.76             |                  |                            |                 |        | 1.89  |
| F                              |                           |                   | 0.01                       | 0.10                      | 0.14  | 0.01              |                   |                           | 0.24   | 0.05                | 0.01  | 0.02                      | 0.16             |                  |                            |                 |        | 0.01  |

| Cl                         |      |      | 0    | 0.05  | 0.02  | 0     |      |      | 0.01  | 0.03 | 0     | 0.05 | 0.08  |      |      |      |      | 0.10 |
|----------------------------|------|------|------|-------|-------|-------|------|------|-------|------|-------|------|-------|------|------|------|------|------|
| Fe/(Fe+Mg)%                | 13.6 | 30.5 | 33.7 | 37.2  | 38.3  | 40.1  | 22.4 | 31.7 | 32.7  | 40.5 | 26.3  | 84.7 | 37.8  | 23.4 | 13.1 | 42.8 | 22.4 | 48.7 |
| P, kb                      |      |      | 0.55 | 0.5   | 0.9   | 1.5   |      |      | 0.65  | 2.95 | 0.31  | 7.21 |       |      |      |      |      | 11.4 |
| T°C                        | 1000 | 1200 | 781  | 862   | 855   | 845   | 930  | 1260 | 740   | 812  | 778   | 743  | 687   | 1000 | 1100 | 1250 | 1172 | 1025 |
| Log f O <sub>2</sub>       |      |      | -13  | -11.4 | -12.7 | -13.5 |      |      | -13.3 |      | -11.5 |      | -14.8 |      |      |      |      |      |
| H <sub>2</sub> O in melt % |      |      | 4.8  | 3.2   | 3.7   | 44    |      |      | 5.3   |      | 2.9   |      | 4.2   |      |      |      |      |      |

*Notes:* the analyses were performed by L.A. Pavlova and S.P. Roev at IGABM SB RAS using the Camebax-micro x-ray microanalyzer. Calculations T°C during crystallization of the pyroxenes – by [40,41]; T°C amphiboles and H<sub>2</sub>O\* in melt – by [42], P– pressure during crystallization of the amphiboles – by [43].
