# Supplementary material
Source: MDPI journal article supplement (https://www.mdpi.com/2075-163X/11/3/266)
Supplement: s1 [file s1]

**Table S4.** Contents of trace and rare elements in magmatic rocks (ppm) according to data ICP-MS analysis and parameters of tetrad effects

| Element | T 704/5 | T 705/2 | T 706/3 | T 708/2 | T 628/1 | T 629/1 | T 629/4 | T 629/6 | T 630/2 | T 632/2 | T 632/6 | T 635/1 | T 750/2 | T 750/4 | T 751/1 | T 752/5 | T 753/4 |
|---------|---------|---------|---------|---------|---------|---------|---------|---------|---------|---------|---------|---------|---------|---------|---------|---------|---------|
|         | 1       | 2       | 3       | 4       | 5       | 6       | 7       | 8       | 9       | 10      | 11      | 12      | 13      | 14      | 15      | 16      | 17      |
| Be      | 1.21    | 3.15    | 2.53    | 1.88    | 4.27    | 1.57    | 2.33    | 6.6     | 2.84    | 3.63    | 4.48    | 9.8     | 3.52    | 6.3     | 4.75    | 5.8     | 5.4     |
| V       | 57      | 17      | 6.5     | 84      | 81      | 29      | 8.3     | 36      | 6.6     | 4.53    | 19      | -       | 31      | 6.2     | 36      | 4.63    | 8.5     |
| Cr      | 471     | 260     | 126     | 368     | 126     | 71      | 86      | 303     | 184     | 158     | 211     | 114     | 564     | 214     | 614     | 267     | 531     |
| Co      | 9.8     | 2.59    | 1.31    | 41      | 9.1     | 5.3     | 0.98    | 6.1     | 1.39    | 4.42    | 2.88    | 0.59    | 5.9     | 1.78    | 6.8     | 1.4     | 3.09    |
| Ni      | 35      | 16      | 17      | 152     | 9.6     | 7.5     | 4.43    | 15      | 20      | 10.6    | 13.3    | 60      | 41      | 30      | 37      | 21      | 33      |
| Cu      | 30      | 7.8     | 15      | 75      | 9.9     | 10.4    | 7.2     | 7.4     | 10.7    | 53      | 6.9     | 6.2     | 14.6    | 10      | 15      | 16      | 13.6    |
| Zn      | 96      | 114     | 557     | 793     | 44      | 33      | 137     | 34      | 16      | 374     | 91      | 40      | 114     | 99      | 136     | 83      | 94      |
| Ga      | 14.1    | 17      | 16      | 20      | 20      | 19      | 18      | 17      | 10.2    | 12.5    | 17      | 31      | 20      | 17      | 20      | 17      | 19      |
| Ge      | 1.95    | 1.56    | 1.84    | 1.59    | 1.67    | 1.44    | 1.15    | 1.75    | 1.25    | 1.49    | 1.82    | 2.98    | 1.7     | 1.74    | 1.58    | 1.87    | 1.68    |
| As      | -       | -       | -       | -       | -       | -       | -       | -       | -       | -       | -       | -       | 8.5     | 9.0     | 9.7     | 7.2     | 3.44    |
| Rb      | 73      | 130     | 132     | 121     | 114     | 12.0    | 12.8    | 193     | 126     | 143     | 134     | 323     | 185     | 278     | 194     | 276     | 260     |
| Sr      | 393     | 221     | 103     | 344     | 557     | 310     | 351     | 389     | 196     | 268     | 231     | 33      | 424     | 100     | 427     | 84      | 184     |
| Y       | 24      | 25      | 14.5    | 25      | 24      | 16      | 16      | 21      | 5.5     | 5.4     | 19      | 38      | 25      | 12.6    | 26      | 15      | 18      |
| Zr      | 111     | 187     | 126     | 207     | 367     | 201     | 259     | 179     | 70      | 161     | 219     | 160     | 235     | 12.6    | 296     | 138     | 154     |
| Nb      | 5.6     | 11.4    | 10.1    | 10.5    | 18      | 17      | 18      | 24      | 8.3     | 13.3    | 18      | 40      | 21      | 21      | 21      | 23      | 19      |
| Mo      | 2.09    | 1.8     | 1.13    | 2.35    | 2.9     | 1.47    | 0.46    | 3.66    | 3.81    | 1.81    | 2.91    | 1.24    | 3.15    | 1.98    | 3.06    | 1.54    | 3.02    |
| Sn      | 1.63    | 3.54    | 7.2     | 1.13    | 4.84    | 6.7     | 6.7     | 9.3     | 18      | 1.2     | 5.6     | 28      | 6.3     | 2.32    | 5.6     | 3.48    | 3.15    |
| Sb      | 0.73    | 1.12    | 1.07    | 0.62    | 2.86    | 1.18    | 1.58    | 5.5     | 18      | 2.04    | 1.16    | 7.4     | 0.66    | 0.88    | 0.77    | 0.33    | 0.42    |
| Ba      | 10688   | 1752    | 2406    | 1071    | 908     | 133     | 153     | 552     | 337     | 502     | 627     | 71      | 856     | 252     | 834     | 156     | 432     |
| Hf      | 2.9     | 4.78    | 3.82    | 5.05    | 9.05    | 4.84    | 5.9     | 5.25    | 2.32    | 5.5     | 6.25    | 7.5     | 6.7     | 4.68    | 7.3     | 5.3     | 4.9     |
| Ta      | 0.4     | 0.98    | 1.02    | 0.71    | 1.46    | 1.17    | 1.31    | 3.22    | 1.60    | 2.94    | 1.55    | 4.58    | 1.96    | 3.87    | 2.07    | 3.82    | 2.91    |
| W       | 1.88    | 0.93    | 1.7     | 1.29    | 3.15    | 1.54    | 1.62    | 65      | 5.4     | 1.93    | 5       | 8.3     | 2.5     | 1.55    | 1.92    | 2.76    | 2.02    |
| Pb      | 26      | 14      | 12.1    | 6.6     | 19      | 9.9     | 13.5    | 30      | 123     | 141     | 21      | 89      | 26      | 33      | 38      | 23      | 23      |
| Th      | 5.6     | 14.0    | 9.9     | 5.7     | 15      | 6.2     | 5.1     | 30      | 28      | 42      | 18      | 29      | 26      | 42      | 23      | 37      | 32      |
| U       | 1.83    | 3.9     | 3.1     | 2.5     | 3.77    | 2.9     | 1.32    | 13.1    | 4.51    | 6.6     | 5.7     | 19      | 4.81    | 5.3     | 5.6     | 3.66    | 3.97    |
| La      | 27      | 39      | 19      | 10.5    | 62      | 18      | 17      | 3       | 38      | 15      | 31      | 4.64    | 50      | 18      | 52      | 24      | 22      |
| Ce      | 51      | 82      | 49      | 20      | 123     | 46      | 51      | 78      | 79      | 37      | 63      | 5.6     | 107     | 47      | 116     | 54      | 49      |
| Pr      | 5.7     | 8.4     | 4.81    | 2.23    | 12.4    | 5.4     | 6.3     | 7.9     | 6.5     | 3.04    | 6.4     | 0.78    | 12.0    | 4.72    | 12.7    | 5.8     | 5.6     |
| Nd      | 22      | 30      | 18      | 9.6     | 45      | 22      | 26      | 28      | 20      | 10.4    | 22      | 3.38    | 45.5    | 16.3    | 45.3    | 19.9    | 20.8    |
| Sm      | 5.08    | 6.1     | 3.59    | 2.71    | 7.8     | 4.97    | 5.5     | 5.03    | 2.42    | 1.58    | 4.1     | 1.46    | 8.5     | 2.86    | 8.0     | 3.54    | 4.24    |
| Eu      | 1.68    | 0.93    | 0.65    | 1.06    | 1.74    | 0.89    | 1.53    | 1.04    | 0.51    | 0.48    | 0.76    | 0.036   | 1.42    | 0.41    | 1.42    | 0.36    | 0.64    |
| Gd      | 5.5     | 6.0     | 3.55    | 4.20    | 7.0     | 5.1     | 4.88    | 4.66    | 1.97    | 1.35    | 4.14    | 2.76    | 6.8     | 2.46    | 6.8     | 2.72    | 3.85    |

Table 4 (continuation)

|                   |       |       |       |       |       |       |       |       |       |       |       |       |       |       |       |       |       |
|-------------------|-------|-------|-------|-------|-------|-------|-------|-------|-------|-------|-------|-------|-------|-------|-------|-------|-------|
| Tb                | 0.73  | 0.83  | 0.46  | 0.71  | 0.79  | 0.69  | 0.67  | 0.62  | 0.18  | 0.16  | 0.57  | 0.61  | 0.86  | 0.37  | 0.90  | 0.40  | 0.54  |
| Dy                | 4.56  | 4.9   | 2.76  | 4.47  | 4.38  | 3.76  | 3.77  | 3.93  | 0.98  | 0.92  | 3.30  | 6.3   | 4.86  | 2.21  | 5.1   | 2.53  | 3.16  |
| Ho                | 0.91  | 0.90  | 0.51  | 0.99  | 0.87  | 0.61  | 0.69  | 0.76  | 0.22  | 0.19  | 0.74  | 1.80  | 0.87  | 0.45  | 0.94  | 0.49  | 0.59  |
| Er                | 2.42  | 2.92  | 1.67  | 3.00  | 2.68  | 1.91  | 1.97  | 2.47  | 0.72  | 0.59  | 2.27  | 7.1   | 2.67  | 1.53  | 2.82  | 1.62  | 1.86  |
| Tm                | 0.33  | 0.40  | 0.19  | 0.40  | 0.37  | 0.22  | 0.27  | 0.38  | 0.095 | 0.095 | 0.35  | 1.23  | 0.41  | 0.28  | 0.43  | 0.30  | 0.31  |
| Yb                | 2.42  | 2.77  | 1.23  | 2.79  | 2.39  | 1.35  | 1.70  | 2.60  | 0.87  | 0.81  | 2.50  | 9.1   | 2.46  | 2.08  | 2.82  | 2.22  | 2.01  |
| Lu                | 0.40  | 0.39  | 0.17  | 0.41  | 0.35  | 0.21  | 0.22  | 0.42  | 0.18  | 0.16  | 0.37  | 1.32  | 0.36  | 0.34  | 0.42  | 0.36  | 0.31  |
| Total             | 175.0 | 240.0 | 138.0 | 98.2  | 340.0 | 149.0 | 164.0 | 222.0 | 178.0 | 88.0  | 183.0 | 86.9  | 313   | 128   | 327   | 153   | 154   |
| La/Yb             | 11.2  | 14.1  | 15.4  | 3.8   | 25.9  | 13.3  | 10.0  | 14.2  | 46.9  | 18.5  | 12.1  | 0.5   | 20.3  | 8.7   | 18.4  | 10.8  | 10.9  |
| Ce/Yb             | 21.1  | 29.6  | 39.8  | 7.2   | 53.5  | 34.1  | 30    | 30    | 90.8  | 45.7  | 25.2  | 0.6   | 43.5  | 18.2  | 41.1  | 24.3  | 24.4  |
| Ta/Yb             | 0.16  | 0.35  | 0.83  | 0.25  | 0.64  | 0.87  | 0.78  | 1.23  | 1.84  | 3.63  | 0.67  | 0.5   | 0.8   | 1.31  | 0.72  | 1.72  | 1     |
| Nb/Ta             | 14    | 11.6  | 10    | 14.8  | 12.3  | 14.5  | 13.7  | 7.5   | 5.2   | 8.3   | 11.6  | 8.7   | 10.7  | 5.4   | 10.1  | 6     | 6.5   |
| Zr/Nb             | 19.8  | 16.4  | 12.5  | 19.7  | 20.4  | 11.8  | 14.4  | 7.5   | 8.4   | 12.1  | 11.5  | 4     | 11.2  | 0.6   | 14.1  | 6     | 8.1   |
| Zr/Hf             | 38.3  | 39.1  | 33    | 41    | 40.6  | 41.5  | 43.9  | 34.1  | 30.2  | 29.3  | 35    | 21.3  | 35.1  | 0.3   | 40.5  | 26    | 31.4  |
| TE <sub>1</sub>   | 1.026 | 1.129 | 1.231 | 0.964 | 1.092 | 1.160 | 1.248 | 1.124 | 1.207 | 1.234 | 1.109 | 0.755 | 1.111 | 1.271 | 1.165 | 1.184 | 1.133 |
| TE <sub>3</sub>   | 0.904 | 0.959 | 0.912 | 0.956 | 0.832 | 0.987 | 0.946 | 0.912 | 0.683 | 0.828 | 0.845 | 0.961 | 0.924 | 0.931 | 0.930 | 0.951 | 0.948 |
| TE <sub>4</sub>   | 0.816 | 0.883 | 0.807 | 0.845 | 0.865 | 0.763 | 0.912 | 0.876 | 0.708 | 0.815 | 0.915 | 0.989 | 0.915 | 0.950 | 0.906 | 0.955 | 0.929 |
| TE <sub>1-4</sub> | 0.911 | 0.985 | 0.968 | 0.920 | 0.923 | 0.956 | 1.025 | 0.965 | 0.835 | 0.941 | 0.950 | 0.895 | 0.979 | 1.040 | 0.994 | 1.025 | 0.999 |
| TE <sub>3,4</sub> | 0.859 | 0.920 | 0.858 | 0.899 | 0.848 | 0.868 | 0.929 | 0.894 | 0.695 | 0.821 | 0.879 | 0.975 | 0.919 | 0.940 | 0.918 | 0.953 | 0.938 |

Notes: 1– granodiorite, 2 – granite, 3 – granite-porphyry, 4– diorite porphyry of Istekh ore field; 5 – granodiorite, 6 – andesite, 7 – granite, 8 – granodiorite, 9 – pegmatite, 10 – aplite, 11 – pegmatite, 12 – rhyolite of Kuranakh ore field; 13 – amphibole-biotite granite, 14 – pegmatoid granite, 15 – granodiorite, 16 – leucogranite, 17 – biotite granite of the Elikchan ore field. Calculation of tetrad-affects by [51].
