# Supplementary material
Source: MDPI journal article supplement (https://www.mdpi.com/2075-163X/11/3/266)
Supplement: s1 [file s1]

**Table S5.** Geochemical composition of the magmatic rocks

| Sample.            | Rock                     | B<br>(g/t) | Ba<br>(g/t) | Sr<br>(g/t) | Cu<br>(g/t) | Zn<br>(g/t) | As<br>(g/t) | Mo<br>(g/t) | Ag<br>(g/t) | Sn<br>(g/t) | Sb<br>(g/t) | W<br>(g/t) | Pb<br>(g/t) | Bi<br>(g/t) | Au<br>(mg/t) |
|--------------------|--------------------------|------------|-------------|-------------|-------------|-------------|-------------|-------------|-------------|-------------|-------------|------------|-------------|-------------|--------------|
| Kuranakh ore field |                          |            |             |             |             |             |             |             |             |             |             |            |             |             |              |
| 629*1a             | diorite                  | 22         | 2400        | 400         | 10.4        | 93          | 31          | 7           | 2           | 6.7         | 10.7        | 4.8        | 9.9         | 0.45        | 1            |
| 628/3              |                          | 28         | 1100        | 620         | 20          | 85          | 150         | 2.1         | 0.15        | 7.8         | 12          | 5.4        | 15          | 0.4         | 0.1          |
| 628/6              |                          | 21         | 880         | 420         | 15.1        | 70          | 38          | 4.5         | 2.1         | 5           | 11.5        | 2.5        | 12          | 0.5         | 0.2          |
| 629/3              | granodiorite             | 20         | 908         | 557         | 10          | 100         | 31          | 1           | 0.5         | 12          | 7           | 6.4        | 18          | 1           | 30           |
| 631/1              |                          | 25         | 1100        | 660         | 10          | 70          | 22          | 2           | 0.7         | 13          | 1.1         | 2          | 200         | 10          | 10           |
| 631                | “                        | 12         | 1100        | 660         | 7.5         | 70          | 15          | 5           | 0.2         | 8           | 8           | 6          | 30          | 0.5         | 5            |
| 631/3              | “                        | 20         | 1100        | 480         | 7.5         | 55          | 20          | 3.5         | 0.2         | 9           | 4           | 5          | 25          | 0.8         | 1            |
| 632/4              | «                        | 27         | 945         | 510         | 7.5         | 28          | 15          | 5           | 0.3         | 4.8         | 3           | 3          | 24          | 2           | 1            |
| 1213/2a            |                          | 12         | 1100        | 520         | 10          | 39          | 19          | 3           | 0.9         | 4           | 3           | 5          | 38          | 2           | 5            |
| 1214/1             |                          | 25         | 1000        | 580         | 7.4         | 48          | 207         | 4           | 0.6         | 5.4         | 3.8         | 5.6        | 18          | 7           | 2            |
| 1215/1             | granite                  | 35         | 860         | 501         | 12          | 32          | 21          | 2           | 0.6         | 10          | 3.3         | 15         | 18          | 5           | 10           |
| 1213/2             |                          | 15         | 864         | 310         | -           | 60          | 24          | 5           | 0.3         | 7.8         | 6           | 15         | 52          | 3           | 12           |
| 632/5              | “                        | 20         | 770         | 890         | 7.5         | 39          | 30          | 2           | 10          | 7.8         | 2.6         | 5          | 50          | 3           | 8            |
| 634/3              | “                        | 60         | 850         | 430         | 15          | 50          | 1000        | 1.5         | 0.5         | 100         | 30          | 12         | 150         | 30          | 2            |
| 1213/4             | «                        | 56         | 840         | 520         | -           | 75          | 24          | 2           | 0.6         | 7           | 6.4         | 3          | 30          | 4           | 10           |
| 1216/6             |                          | 42         | 830         | 540         | 22          | 121         | 21          | 2.5         | 0.58        | 8.2         | 16          | 20         | 46          | 0.6         | 8.8          |
| 632/2a             | leucogranite             | 20         | 780         | 290         | 20          | 120         | 120         | 3.2         | 0.6         | 14          | 8           | 8          | 50          | 3           | 2            |
| 630/2a             |                          | 16         | 337         | 198         | 10.7        | 16          | 30          | 3.8         | 0.7         | 1822        | 18          | 15         | 123         |             |              |
| 1217/5             |                          | 49         | 130         | 72          | 61          | 122         | 190         | 6.5         | 3           | 12          | 12          | 12         | 60          | 2           | 10           |
| 630/3              | pegmatite                | 23         | 337         | 196         | 20          | 160         | 30          | 7           | 150         | 7           | 30          | 11         | 200         | 8           | 8            |
| 630/3a             |                          | 48         | 627         | 230         | 15          | 110         | 150         | 5           | 110         | 9           | 20          | 17         | 25          | 5.7         | 2            |
| 632/6              |                          | 34         | 730         | 260         | 3.8         | 100         | 408         | 2           | 10          | 9.5         | 10.9        | 5.5        | 30          | 1           | 12           |
| 632/5              |                          | 80         | 627         | 231         | 15          | 110         | 150         | 7           | 0.7         | 6.3         | 20          |            | 25          |             | 7            |
| 635/1              | rhyolite-<br>porphyry    | 50         | 1700        | 33          | 6.2         | 40          | 38          | 21.4        | 0.13        | 28          | 71          | 12.4       | 89          | 10          | 1.8          |
| 635/3              |                          | 19         | 1000        | 200         | 124         | 117         | 88          | 1.8         | 12          | 84          | 3.8         | 15.2       | 64          | 0.7         | 12           |
| 1212/8             | granite-<br>porphyry     | 47         | 1240        | 69          | 6.9         | 83          | 150         | 2           | 3           | 78          | 1.2         | 8.3        | 105         | 20          | 2.4          |
| Elikchan ore field |                          |            |             |             |             |             |             |             |             |             |             |            |             |             |              |
| 207/3              | granodiorite             | 15         | 1300        | 1200        | 15          | 130         | 34          | 7           | 0.2         | 3           | 6.1         | 14         | 20          | 0.6         | 1.3          |
| 10/2               | «                        | 30         | 1500        | 880         | 40          | 85          | 30          | 10          | 0.5         | 10          | 9           |            | 42          | 0.3         | 2            |
| 12/1               | «                        | 35         | 1300        | 1100        | 17          | 70          | 43          | 8           | 0.1         | 5           | 4.1         | 5          | 28          |             | 1            |
| 645/6              | «                        | >100       | 2700        | 380         | 20          | 50          | 100         | 5           | 0.15        | 4           | 0.5         | 20         | 50          | 0.8         | 0.8          |
| 209/3              | «                        | 15         | 1300        | 1100        | 20          | 50          | 43          | 2           | 0.3         | 4           | 3.2         | 12         | 100         | 1           | 0.8          |
| 212/9              | «                        | 21         | 1500        | 930         | 210         | 198         | 48          | 10          | 0.1         | 6           | 10          | 18         | 26          | 1.5         | 3            |
| 13/1               | «                        | 29         | 1200        | 980         | 10          | 100         | 44          | 10          | 10          | 7           | 4.6         | 15         | 33          | 0.5         | 1            |
| 196/12             | granodiorit-<br>porphyry | 12         | 940         | 220         | 130         | 74          | 122         | 2           | 0.7         | 40          | 13.4        | 34         | 62          | 1.5         | 4            |
| 28/6               | granite «                | 30         | 950         | 440         | 50          | 70          | 500         | 10          | 0.1         | 30          | 8           | 5          | 15          | 1           | -            |
| 267/1              | «                        | 39         | 1200        | 530         | 12          | 100         | 24          | 3           | 0.1         | 3           | 10          | 12         | 40          | 0.4         | -            |
| 229                | «                        | >100       | 850         | 180         | 70          | 3000        | 100         | 2           | 1           | 5000        |             | 20         | 35          | 1           | 1            |
| 722/4              | «                        | 20         | 710         | 170         | 20          | 150         | 20          | 5           | 0.15        | 5           | 7           | 5          | 15          | 0.5         | 2            |
| 28/10              | «                        | 26         | 960         | 220         | 12          | 145         | 70          | 7           | 0.1         | 5.4         | 6           | 15         | 100         | 1           | 1            |
| 206/4              | «                        | 20         | 910         | 260         | 11          | 50          | 32          | 1.5         | 0.5         | 10          | 7           | 16         | 10          | 10          | -            |
| 28/4               | «                        | 44         | 830         | 250         | 15          | 50          | 70          | 10          | 0.15        | 5           | 10          | 50         | 7           | 1.5         |              |
| 267/4              | leucogranite             | 24         | 680         | 154         | 20          | 390         | 120         | 2           | 5           | 70          | 10          | 11         | 65          | 2           | 0.8          |
| 11/5               | «                        | 30         | 580         | 190         | 35          | 70          | 45          | 10          | 0.2         | 3           | 11          | 20         | 60          | 2.4         | 10           |
| 720/5              | «                        | 49         | 290         | 96          | 61          | 81          | 190         | 4           | 4           | 10.9        | 13.5        | 7.2        | 70          | 0.83        | 2.3          |

| Sample.            | Rock               | B    | Ba   | Sr  | Cu  | Zn  | As   | Mo   | Ag    | Sn  | Sb   | W   | Pb   | Bi    | Au  |
|--------------------|--------------------|------|------|-----|-----|-----|------|------|-------|-----|------|-----|------|-------|-----|
| Elikchan ore field |                    |      |      |     |     |     |      |      |       |     |      |     |      |       |     |
| 214/19             | granite-porphyry   | 46   | 830  | 83  | 30  | 40  | 122  | 5    | 1     | 12  | 1    | 15  | 44   | 0.6   | 1   |
| 241                | «                  | 100  | 1400 | 97  | 30  | 700 | 35   | 5.2  | 0.5   | 35  | 1    | 8   | 20   | 1     | 2   |
| K16/5              | «                  | 20   | 1300 | 240 | 18  | 200 | 28   | 10   | 0.2   | 15  | 10   | 2.5 | 20   | 0.5   | 1   |
| K28/10             | «                  | 42   | 930  | 260 | 15  | 40  | 115  |      | 0.7   | 5   | 5.2  | 3.2 | 20   | 1     | 1   |
| 638/5              | «                  | 70   | 810  | 192 | 20  | 150 | 1000 | 1.5  | 5     | 7   | -    | 5   | 50   | 1     | 10  |
| 725/1              | rhyolite-porphyry  | 28   | 1000 | 88  | 24  | 38  | 28   | 4    | 0.3   | 11  | 0.8  | 3.4 | 10   | 1     | 2   |
| 639/5              | trachy-dolerite    | 47   | 1500 | 710 | 32  | 110 | 64   | 1    | 0.1   | 34  | 12   | 3   | 40   | 0.5   | 14  |
| 639/6              | «                  | 35   | 2100 | 760 | 40  | 178 | 52   | 2    | 0.3   | 25  | 25.6 | 3   | 20   | 0.5   | 6.9 |
| Istekh ore field   |                    |      |      |     |     |     |      |      |       |     |      |     |      |       |     |
| 704/3              | granodiorite       | 46   | 2300 | 605 | 22  | 100 | 38   | 2    | 0.2   | 2   | 4.2  | 2.9 | 15   | 0.5   | 3   |
|                    | «                  |      |      |     |     |     |      |      |       |     |      |     |      |       |     |
| 704/5              |                    | 50   | 1800 | 490 | 18  | 76  | 44   | 3.2  | 0.1   | 2.4 | 2    | 2.5 | 20   | 0.8   | 3.4 |
| 704/6              | «                  | 45   | 2500 | 710 | 130 | 50  | 30   | 1.5  | 0.3   | 2   | 4    | 1   | 29   | 0.3   | -   |
| 706/2              | «                  | 39   | 2700 | 870 | 47  | 61  | 71   | 3.5  | 0.12  | 2.6 | 1.8  | 4.6 | 16   | 1.8   | 1.8 |
| 705/2              | granite            | 42   | 1600 | 240 | -   | 90  | 30   | 2    | 0.2   | 3.5 | 1    | 1   | 14   | 1     | 1   |
| 7/3                | «                  | 50   | 1400 | 210 | 6.5 | 120 | 29   | 5    | 0.1   | 10  | 1.5  | 3   | 16   | 2     | -   |
| 700/4              | «                  | 44   | 1900 | 240 | 4.7 | 105 | 34   | 2    | 0.1   | 10  | 1    | 2   | 12   | -     |     |
| 708/2              | diorite porphyrite | 50   | 1500 | 230 | 6.1 | 450 | 58   | 2.6  | 0.2   | 6.8 | 1    | 2.4 | 11   | 10    | 0.1 |
| 706/3              | granite-porphyry   | 50   | 260  | 103 | 15  | 103 | 50   | 1.13 | 0.1   | 7.2 | 1.07 | 1.7 | 12.1 |       |     |
| 195/2              | syenite-porphyry   | 42   | 360  | 250 | 20  | 120 | 65   | 4    | 10    | 30  | 25   | 5   | 100  | 2     | 2   |
| 725/1              | rhyolite-porphyry  | 100  | 1000 | 88  | 45  | 100 | 39   | 7    | 0.3   | 10  | 8    | 8   | 30   | 1     | -   |
| 728/1              | granite-porphyry   | 42   | 190  | 40  | 110 | 120 | 36   | 5    | 0.7   | 15  | 10   | 2   | 70   | 2     | 1   |
| 264/4              | rhyolite-porphyry  | 28   | 68   | 54  | 16  | 80  | 35   | 2    | 0.2   | 12  |      | 15  | 20   | -     | 3   |
|                    | Clarke [52]:       | B    | Ba   | Sr  | Cu  | Zn  | As   | Mo   | Ag    | Sn  | Sb   | W   | Pb   | Bi    | Au  |
|                    | granodiorite       | 12.5 | 560  | 440 | 29  | 59  | 1.8  | 1    | 0.056 | 1.9 | 0.2  | 1.6 | 15   | 0.01  | 2.8 |
|                    | granite            | 12.5 | 750  | 150 | 10  | 39  | 1.6  | 1.5  | 0.038 | 3   | 0.2  | 2.2 | 19   | 0.01  | 2.7 |
|                    | basalt             | 5    | 290  | 460 | 92  | 110 | 2    | 1.4  | 0.11  | 4   | 0.34 | 0.8 | 6    | 0.007 | 3.5 |
