# Supplementary material
Source: MDPI journal article supplement (https://www.mdpi.com/2075-163X/11/3/266)
Supplement: s1 [file s1]

**Table S3.** Contents of major (wt.%) elements in the magmatic rocks of Kuranakh, Elikchan and Istekh ore fields the magmatic rocks of Kuranakh, Ekikchan and Istekh ore fields

| Sampl.             | Rock                  | SiO <sub>2</sub> | TiO <sub>2</sub> | Al <sub>2</sub> O <sub>3</sub> | Fe <sub>2</sub> O <sub>3</sub> | FeO  | MnO  | MgO  | CaO  | Na <sub>2</sub> O | K <sub>2</sub> O | P <sub>2</sub> O <sub>5</sub> | CO <sub>2</sub> | H <sub>2</sub> O <sup>-</sup> | H <sub>2</sub> O <sup>+</sup> | F    | Li <sub>2</sub> O | Rb <sub>2</sub> O | S    | Total  | f%   | T°C [50] |
|--------------------|-----------------------|------------------|------------------|--------------------------------|--------------------------------|------|------|------|------|-------------------|------------------|-------------------------------|-----------------|-------------------------------|-------------------------------|------|-------------------|-------------------|------|--------|------|----------|
| Kuranakh ore field |                       |                  |                  |                                |                                |      |      |      |      |                   |                  |                               |                 |                               |                               |      |                   |                   |      |        |      |          |
| 629/1              | andesite              | 60.13            | 0.96             | 17.24                          | 2.25                           | 2.15 | 0.10 | 3.02 | 4.95 | 3.18              | 2.25             | 0.14                          | 1.75            | -                             | 2.00                          | 0.07 | 0.011             | 0.001             | -    | 100.23 | 59.3 | 1063     |
| 1483               | diorite               | 60.80            | 0.63             | 18.37                          | 0.45                           | 2.90 | 0.07 | 2.80 | 8.19 | 4.25              | 0.59             | 0.18                          | -               | 0.14                          | -                             | -    | -                 | -                 | -    | 99.23  | 54.5 | 1017     |
| 1482               | «                     | 60.90            | 0.56             | 18.20                          | 0.82                           | 4.87 | 0.05 | 2.13 | 5.92 | 3.24              | 2.44             | 0.18                          | -               | -                             | -                             | -    | -                 | -                 | -    | 99.31  | 67.7 | 1004     |
| 629/3              | granodiorite          | 62.67            | 0.84             | 16.78                          | 3.41                           | 1.55 | 0.11 | 2.37 | 4.19 | 3.52              | 3.33             | 0.16                          | 0.14            | -                             | 0.85                          | 0.08 | 0.001             | 0.003             | 0.02 | 100.02 | 67.7 | 1054     |
| 1007               | «                     | 62.32            | 0.53             | 16.47                          | 1.25                           | 3.65 | 0.08 | 3.00 | 4.55 | 3.77              | 4.13             | 0.27                          | -               | -                             | -                             | -    | -                 | -                 | -    | 100.02 | 62.0 | 1010     |
| 415                | «                     | 62.46            | 0.54             | 14.70                          | 1.38                           | 4.92 | 0.05 | 2.32 | 3.46 | 3.12              | 4.32             | 0.24                          | 0.65            | -                             | 0.82                          | -    | -                 | -                 | -    | 98.98  | 73.1 | 1015     |
| 1483/6             | «                     | 62.66            | 0.58             | 17.12                          | 0.58                           | 4.67 | 0.04 | 2.05 | 5.26 | 3.26              | 2.15             | 0.19                          | -               | 0.27                          | -                             | -    | -                 | -                 | -    | 98.54  | 73.9 | 1016     |
| 429                | «                     | 64.04            | 0.84             | 15.10                          | 1.37                           | 3.70 | 0.08 | 2.03 | 4.08 | 3.31              | 4.26             | 0.25                          | -               | 0.10                          | -                             | -    | -                 | -                 | -    | 99.06  | 71.4 | 1063     |
| 447                | «                     | 64.61            | 0.69             | 14.97                          | 1.92                           | 3.13 | 0.07 | 2.30 | 3.91 | 3.49              | 4.14             | 0.25                          |                 | 0.22                          | 0.80                          | -    | -                 | -                 | -    | 100.28 | 68.7 | 1047     |
| 1407               | «                     | 64.62            | 0.82             | 16.09                          | 1.23                           | 3.24 | 0.07 | 2.05 | 3.93 | 3.70              | 4.17             | 0.22                          | -               | 0.10                          | -                             | -    | -                 | -                 | -    | 100.14 | 68.6 | 1056     |
| 632/4              | «                     | 64.72            | 0.30             | 17.65                          | 1.25                           | 1.29 | 0.04 | 0.84 | 4.06 | 4.38              | 3.48             | 0.11                          | 0.66            | 0.12                          | 0.65                          | 0.06 | 0.008             | 0.014             | 0.05 | 99.56  | 75.1 | 914      |
| 1213/6             | «                     | 64.94            | 0.69             | 15.52                          | 0.11                           | 4.29 | 0.08 | 2.57 | 3.42 | 3.25              | 4.05             | 0.24                          | 0               | 0.05                          | 0.45                          | 0.12 | 0.011             | 0.026             | 0,02 | 99.79  | 63.1 | 1044     |
| 833                | «                     | 64.98            | 0.88             | 15.24                          | 0.61                           | 3.74 | 0.08 | 2.17 | 3.79 | 3.40              | 4.34             | 0.17                          | -               | 0.19                          | -                             | -    | -                 | -                 | -    | 99.40  | 66.7 | 1065     |
| 605                | «                     | 65.06            | 0.67             | 15.53                          | 0.60                           | 3.99 | 0.06 | 1.96 | 3.16 | 3.41              | 4.20             | 0.21                          | -               | 0.14                          | 0.84                          | -    | -                 | -                 | 0.01 | 99.70  | 70.1 | 1041     |
| 580                | «                     | 65.22            | 0.80             | 15.32                          | 0.89                           | 3.31 | 0.10 | 2.19 | 3.86 | 3.62              | 4.22             | 0.11                          | -               | 0.08                          | 0.36                          | -    | -                 | -                 | -    | 100.00 | 65.7 | 1058     |
| 1214/1             | «                     | 66.15            | 0.65             | 15.54                          | 1.32                           | 2.99 | 0.07 | 2.03 | 2.38 | 3.17              | 4.41             | 0.22                          | 0               | 0.05                          | 1.00                          | 0.09 | 0.009             | 0.024             | 0,01 | 100.06 | 68.0 | 1038     |
| 2016               | «                     | 66.68            | 0.20             | 14.60                          | 1.66                           | 3.45 | 0.06 | 0.73 | 2.28 | 3.70              | 4.82             | 0.10                          | 0.50            | -                             | 0.66                          | -    | -                 | -                 | -    | 99.44  | 87.5 | 871      |
| 1215/1             | granite               | 68.18            | 0.55             | 14.67                          | 0.30                           | 3.44 | 0.06 | 1.82 | 2.67 | 3.00              | 4.74             | 0.16                          | 0               | -                             | 0.45                          | 0.09 | 0.006             | 0.023             | 0,02 | 100.18 | 67.3 | 923      |
| 164                | «                     | 68.58            | 0.50             | 15.13                          | 0.46                           | 2.88 | 0.05 | 1.40 | 2.73 | 3.96              | 4.48             | 0.08                          | -               | 0.10                          | 0.34                          | -    | -                 | -                 | -    | 100.59 | 70.4 | 913      |
| 629/4              | «                     | 69.14            | 0.43             | 14.70                          | 0.78                           | 2.27 | 0.05 | 1.43 | 2.36 | 3.31              | 4.40             | 0.14                          | 0               | 0.28                          | 0.81                          | 0.07 | 0.007             | 0.013             | 0,12 | 100.03 | 68.1 | 903      |
| 678                | «                     | 69.24            | 0.36             | 15.04                          | 0.68                           | 2.65 | 0.04 | 1.27 | 2.25 | 3.81              | 4.85             | 0.13                          | -               | 0.08                          | -                             | -    | -                 | -                 | -    | 100.32 | 72.4 | 883      |
| 442                | «                     | 70.20            | 0.49             | 14.93                          | 0.45                           | 1.83 | 0.05 | 0.86 | 2.23 | 3.25              | 5.11             | 0.16                          | -               | 0.15                          | -                             | -    | -                 | =                 | -    | 99.56  | 72.6 | 913      |
| 442/1              | «                     | 75.90            | 0.56             | 12.60                          | 0.26                           | 1.04 | 0    | 0.15 | 1.01 | 2.49              | 6.02             | 0.05                          | 0.07            | -                             | 0.25                          | -    | -                 | -                 | -    | 100.40 | 89.7 | 935      |
| 1462               | leucogranite          | 76.00            | 0.17             | 12.42                          | 0.36                           | 1.14 | 0.01 | 0.65 | 1.06 | 2.52              | 5.82             | 0.04                          | -               | -                             | -                             | -    | -                 | -                 | -    | 100.19 |      | 811      |
| 1213/4             | «                     | 77.13            | 0.08             | 12.72                          | 0.39                           | 0.85 | 0.02 | 0.08 | 0.17 | 3.22              | 4.71             | 0.01                          | 0.54            | -                             | 0.26                          | 0.03 | 0,006             | 0,034             | 0,03 | 100.28 | 93.9 | 662      |
| 632/2              | aplite                | 74.72            | 0.14             | 12.50                          | 0.80                           | 0.43 | 0.01 | 0.15 | 0.70 | 2.70              | 5.83             | 0.02                          | 0.55            | 0.16                          | 0.13                          | 0.04 | 0,002             | 0,02              | 0,15 | 98.89. | 89.1 | 790      |
| 630/3              | pegmatite             | 78.48            | 0.08             | 10.79                          | 0.98                           | 0.45 | 0.01 | 0.05 | 0.70 | 3.22              | 4.16             | 0.02                          | 0.44            | 0.11                          | 0.22                          | 0.03 | 0,007             | 0,029             | 0,02 | 99.69  | 96.6 | 919      |
| 324/10             | diorite<br>porphyrite | 55.80            | 0.68             | 15.80                          | 3.88                           | 4.00 | 0.13 | 6.09 | 7.96 | 2.83              | 1.54             | 0.13                          | 0               | 0.12                          | 2.23                          | -    | -                 | -                 | -    | 101.07 | 56.4 | 1041     |
| 5570/6             | «                     | 58.84            | 0.77             | 18.02                          | 0.86                           | 6.00 | 0.12 | 3.24 | 6.50 | 3.15              | 1.99             | 0.19                          | -               | 0.28                          | -                             | -    | -                 | -                 | -    | 99.68  | 67.9 | 1040     |

| sample              | rock              | SiO <sub>2</sub> | TiO <sub>2</sub> | Al <sub>2</sub> O <sub>3</sub> | Fe <sub>2</sub> O <sub>3</sub> | FeO  | MnO  | MgO  | CaO  | Na <sub>2</sub> O | K <sub>2</sub> O | P <sub>2</sub> O <sub>5</sub> | CO <sub>2</sub> | H <sub>2</sub> O <sup>-</sup> | H <sub>2</sub> O <sup>+</sup> | F    | Li <sub>2</sub> O | Rb <sub>2</sub> O | S    | Total  | f%   | T°C  |
|---------------------|-------------------|------------------|------------------|--------------------------------|--------------------------------|------|------|------|------|-------------------|------------------|-------------------------------|-----------------|-------------------------------|-------------------------------|------|-------------------|-------------------|------|--------|------|------|
| Elikchan ore fields |                   |                  |                  |                                |                                |      |      |      |      |                   |                  |                               |                 |                               |                               |      |                   |                   |      |        |      |      |
| 447v                | diorite           | 60.54            | 0.80             | 16.55                          | 0.97                           | 3.46 | 0.10 | 3.25 | 4.91 | 3.44              | 3.35             | 0.10                          | 1.26            | 0.04                          | 0.43                          | -    | -                 | -                 | -    | 99.16  | 57.7 | 1051 |
| 207/3               | granodiorite      | 62.86            | 0.68             | 15.26                          | 1.41                           | 3.28 | 0.09 | 2.98 | 4.00 | 3.28              | 4.56             | 0.22                          | 0.55            | 0.02                          | 0.62                          | 0.12 | 0.005             | 0.0203            | 0.02 | 99.96  | 61.1 | 1044 |
| 10/2                | «                 | 63.76            | 0.62             | 15.16                          | 1.17                           | 3.98 | 0.07 | 2.74 | 3.99 | 3.04              | 3.96             | 0.21                          | 0.10            | 0.27                          | 1.10                          | 0.09 | 0.014             | 0.014             | 0.10 | 100.12 | 65.3 | 1036 |
| 12/1                | «                 | 63.84            | 0.59             | 15.43                          | 0.62                           | 4.20 | 0.07 | 2.52 | 3.78 | 3.00              | 3.99             | 0.22                          | 0.22            | 0.34                          | 1.08                          | 0.08 | 0.015             | 0.014             | 0.10 | 99.77  | 65.7 | 1029 |
| 645/6               | «                 | 64.84            | 0.62             | 18.10                          | 1.06                           | 1.58 | 0.05 | 1.28 | 3.07 | 4.03              | 2.69             | 0.13                          | 1.16            | 0.28                          | 0.81                          | 0.15 | 0.003             | 0.0068            | 0.12 | 99.70  | 67.3 | 1011 |
| 11/2                | «                 | 65.06            | 0.56             | 14.94                          | 0.90                           | 3.77 | 0.06 | 2.39 | 3.22 | 2.76              | 4.47             | 0.19                          | 0.33            | 0.23                          | 0.91                          | 0.07 | 0.01              | 0.015             | 0.10 | 99.76  | 66.1 | 1027 |
| 206/6               | «                 | 65.21            | 0.64             | 15.21                          | 0.99                           | 3.16 | 0.07 | 2.46 | 3.30 | 2.90              | 4.44             | 0.15                          | 0.55            | 0.06                          | 0.75                          | 0.10 | 0.0054            | 0.020             | -    | 99.96  | 62.8 | 1038 |
| 209/3               | «                 | 65.61            | 0.43             | 15.88                          | 1.23                           | 2.29 | 0.07 | 1.90 | 3.61 | 3.45              | 4.47             | 0.27                          | 0.87            | 0.12                          | 0.45                          | 0.08 | 0.003             | 0.0192            | 0.05 | 100.68 | 64.9 | 988  |
| 13/1                | «                 | 65.72            | 0.54             | 14.20                          | 0.73                           | 3.74 | 0.06 | 2.39 | 3.29 | 2.70              | 4.30             | 0.17                          | 0.22            | 0.20                          | 0.91                          | 0.08 | 0.012             | 0.016             | 0.10 | 99.18  | 65.2 | 1066 |
| 12/3                | «                 | 65.84            | 0.47             | 15.13                          | 0.57                           | 3.09 | 0.04 | 2.05 | 3.01 | 2.96              | 4.34             | 0.15                          | 0.11            | 0.27                          | 1.25                          | 0.07 | 0.011             | 0.016             | 0.10 | 99.21  | 64.1 | 1006 |
| 174                 | «                 | 66.00            | 0.54             | 15.21                          | 0.68                           | 3.57 | 0.05 | 2.35 | 3.63 | 3.71              | 3.28             | 0.20                          | -               | -                             | 0.73                          | -    | -                 | -                 | -    | 99.95  | 64.4 | 1021 |
| 27/14               | “                 | 67.40            | 0.43             | 15.51                          | 0.22                           | 2.59 | 0.04 | 1.37 | 2.42 | 4.50              | 3.39             | 0.18                          | 0.54            | 0.56                          | 1.10                          | 0.09 | 0.0023            | 0.0116            | 0.16 | 99.95  | 67.2 | 898  |
| 28/6                | granite «         | 69.10            | 0.33             | 13.70                          | 0.59                           | 3.16 | 0.03 | 0.50 | 2.01 | 3.00              | 4.29             | 0.12                          | -               | -                             | 1.70                          | 0.02 | 0.014             | 0.020             | 0.10 | 98.68  | 88.2 | 884  |
| 722/4               | «                 | 69.59            | 0.34             | 14.75                          | 2.27                           | 1.57 | 0.06 | 0.70 | 1.79 | 3.57              | 4.01             | 0.12                          | 0.54            | 0.45                          | 1.95                          | 0.02 | 0.013             | 0.0274            | 0.02 | 101.24 | 84.6 | 870  |
| 28/10               | «                 | 70.10            | 0.30             | 14.09                          | 0.57                           | 2.80 | 0.08 | 0.66 | 1.96 | 3.20              | 4.50             | 0.12                          | 0.10            | 0.36                          | 1.19                          | 0.07 | 0.011             | 0.016             | 0.10 | 99.87  | 83.6 | 871  |
| 1172                | «                 | 70.24            | 0.27             | 14.94                          | 0.50                           | 2.75 | 0.03 | 0.60 | 1.94 | 3.43              | 4.37             | -                             | -               | 0.19                          | 0.95                          | -    | -                 | -                 | -    | 100.02 | 84.4 | 851  |
| 206/4               | «                 | 70.75            | 0.39             | 14.97                          | 0.57                           | 2.00 | 0.04 | 0.81 | 1.82 | 3.07              | 4.62             | 0                             | 0.27            | 0.08                          | 0.52                          | 0.12 | 0.0052            | 0.0168            | 0.09 | 100.06 | 76.0 | 892  |
| 447d                | «                 | 71.71            | 0.30             | 14.64                          | 0.16                           | 1.73 | 0.06 | 0.41 | 1.15 | 3.61              | 3.65             | 0.05                          | -               | 0.04                          | 0.87                          | -    | -                 | -                 | -    | 98.34  | 82.2 | 866  |
| 28/4                | «                 | 71.30            | 0.37             | 13.75                          | 0.22                           | 3.23 | 0.03 | 0.74 | 1.75 | 3.04              | 4.38             | 0.09                          | 0               | -                             | 0.78                          | 0.08 | 0.012             | 0.019             | 0.10 | 99.89  | 82.3 | 895  |
| 447                 | «                 | 72.91            | 0.27             | 14.78                          | 0.05                           | 1.73 | 0.03 | 0.28 | 0.88 | 3.34              | 4.08             | 0.05                          | -               | 0.05                          | 1.07                          | -    | -                 | -                 | -    | 99.47  | 86.4 | 852  |
| 260/7               | leucogranite      | 71.48            | 0.17             | 13.79                          | 1.04                           | 1.51 | 0.04 | 0.28 | 0.70 | 3.46              | 5.24             | 0.05                          | 0.26            | 0.35                          | 1.73                          | 0.06 | 0.005             | 0.013             | -    | 99.83  | 90.1 | 794  |
| 258                 | «                 | 73.48            | 0.16             | 13.54                          | 1.13                           | 1.29 | 0.02 | 0.24 | 0.35 | 3.46              | 5.40             | 0.05                          | 0               | 0.27                          | 1.16                          | 0.03 | 0.003             | 0.014             | 0.10 | 100.43 | 91.0 | 787  |
| 11/5                | «                 | 77.30            | 0.10             | 12.22                          | 0.19                           | 0.86 | 0.04 | 0.33 | 0.66 | 1.71              | 6.15             | 0.01                          | 0               | 0.24                          | 0.39                          | 0.01 | 0.0021            | 0.0144            | -    | 99.99  | 76.1 | 719  |
| 196/2               | rhyodacite        | 67.01            | 0.48             | 17.07                          | 1.16                           | 2.44 | 0.09 | 0.86 | 1.12 | 3.37              | 4.94             | 0.10                          | 0               | 0.14                          | 0.62                          | 0.11 | 0.0038            | 0.0295            | 0.03 | 99.43  | 80.7 | 900  |
| 214/19              | granite-porphyry  | 75.52            | 0.10             | 12.94                          | 0.32                           | 1.14 | 0.08 | 0.13 | 0.30 | 2.74              | 5.40             | 0                             | 0.27            | 0.16                          | 0.84                          | 0.03 | 0.002             | 0.001             | 0.01 | 99.82  | 91.8 | 1007 |
| 720/7               | «                 | 73.62            | 0.12             | 13.18                          | 0.13                           | 1.47 | 0.05 | 0.13 | 0.70 | 3.56              | 4.80             | 0.02                          | 0.27            | 0.39                          | 0.42                          | 0.14 | 0.009             | 0.022             | 0.10 | 98.74  | 92.5 | 1030 |
| 638/5               | rhyolite-porphyry | 71.18            | 0.32             | 15.71                          | 1.46                           | 0.72 | 0.03 | 0.18 | 0.06 | 3.49              | 5.05             | 0.04                          | 0.27            | 0.30                          | 1.25                          | 0.04 | 0.002             | 0.020             | 0.04 | 99.86  | 92.4 | 1011 |

| sample                                                                                                                                            | rock                   | SiO <sub>2</sub> | TiO <sub>2</sub> | Al <sub>2</sub> O <sub>3</sub> | Fe <sub>2</sub> O <sub>3</sub> | FeO  | MnO  | MgO  | CaO   | Na <sub>2</sub> O | K <sub>2</sub> O | P <sub>2</sub> O <sub>5</sub> | CO <sub>2</sub> | H <sub>2</sub> O <sup>-</sup> | H <sub>2</sub> O <sup>+</sup> | F    | Li <sub>2</sub> O | Rb <sub>2</sub> O | S    | Total  | f%   | T°C  |
|---------------------------------------------------------------------------------------------------------------------------------------------------|------------------------|------------------|------------------|--------------------------------|--------------------------------|------|------|------|-------|-------------------|------------------|-------------------------------|-----------------|-------------------------------|-------------------------------|------|-------------------|-------------------|------|--------|------|------|
| Istekh ore field                                                                                                                                  |                        |                  |                  |                                |                                |      |      |      |       |                   |                  |                               |                 |                               |                               |      |                   |                   |      |        |      |      |
| 221                                                                                                                                               | diorite                | 57.42            | 0.82             | 17.44                          | 0                              | 6.86 | 0.12 | 3.89 | 6.91  | 2.97              | 2.54             | 0.10                          | -               | 0.24                          | 0.74                          | -    | -                 | -                 | -    | 99.81  | 63.8 | 1048 |
| 704/3                                                                                                                                             | «                      | 60.08            | 1.53             | 15.73                          | 1.07                           | 6.53 | 0.76 | 2.90 | 2.17  | 3.26              | 3.60             | 0.51                          | -               |                               | 2.44                          | 0.11 | -                 | -                 | -    | 100.69 | 72.4 | 1096 |
| 843                                                                                                                                               | granodiorite           | 65.47            | 0.47             | 16.07                          | 0.35                           | 4.14 | 0.03 | 1.79 | 3.63  | 3.46              | 3.80             | 0.20                          | 0               | 0.08                          | 0.92                          | -    | -                 | -                 | -    | 100.33 | 71.5 | 998  |
| 704/6                                                                                                                                             | «                      | 67.12            | 0.54             | 15.56                          | 0.60                           | 2.44 | 0.18 | 1.60 | 3.47  | 2.82              | 4.49             | 0.08                          | 0.27            | 0.11                          | 0.73                          | 0.10 | 0.004             | 0.023             | 0.01 | 100.04 | 65.5 | 1019 |
| 704/5                                                                                                                                             | «                      | 67.22            | 0.52             | 12.53                          | 0.42                           | 4.45 | 0.45 | 1.81 | 2.66  | 2.16              | 4.16             | 0.19                          | -               | -                             | 2.25                          | 0.05 | -                 | -                 | -    | 98.87  | 74.0 | 1037 |
| 211/2                                                                                                                                             | «                      | 67.61            | 0.41             | 14.91                          | 0.60                           | 1.36 | 0.17 | 1.66 | 4.46  | 3.42              | 4.27             | 0.30                          | 0               | 0.06                          | 1.19                          | -    | -                 | -                 | -    | 100.36 | 54.1 | 990  |
| 7/1                                                                                                                                               | granite                | 68.20            | 0.42             | 14.25                          | 0.60                           | 2.95 | 0.09 | 1.16 | 2.38  | 2.79              | 4.56             | 0.11                          | -               | -                             | 0.77                          | 0.06 | 0.008             | 0.015             | 0.26 | 98.63  | 75.4 | 904  |
| 705/2                                                                                                                                             | «                      | 69.74            | 0.39             | 14.77                          | 0.16                           | 3.12 | 0.08 | 0.85 | 1.44  | 2.91              | 4.76             | 0.02                          | 0               | 0.50                          | 1.20                          | 0.06 | 0.006             | 0.0218            | 0.02 | 99.55  | 79.4 | 893  |
| 192                                                                                                                                               | «                      | 69.82            | 0.32             | 15.14                          | 0                              | 3.29 | 0.02 | 0.76 | 2.58  | 3.89              | 3.71             | 0.30                          | -               | 0.11                          | 0.64                          | -    | -                 | -                 | -    | 100.47 | 81.2 | 870  |
| 219                                                                                                                                               | «                      | 70.18            | 0.30             | 14.74                          | 0                              | 2.72 | 0.01 | 0.85 | 2.51  | 2.93              | 4.77             | 0.20                          | 0               | 0.08                          | 0.96                          | -    | -                 | -                 | -    | 100.17 | 70.6 | 815  |
| 6/1                                                                                                                                               | «                      | 70.80            | 0.28             | 13.55                          | 0.77                           | 1.69 | 0.05 | 0.50 | 1.75  | 2.35              | 5.13             | 0.07                          | -               | -                             | 2.07                          | 0.05 | -                 | -                 | -    | 99.07  | 83.1 | 867  |
| 7/4                                                                                                                                               | «                      | 70.80            | 0.32             | 13.90                          | 0.47                           | 1.87 | 0.05 | 0.73 | 1.69  | 2.80              | 5.20             | 0.08                          | -               | -                             | 1.32                          | 0.04 | -                 | -                 | -    | 99.27  | 76.2 | 879  |
| 364                                                                                                                                               | «                      | 71.27            | 0.33             | 14.90                          | 0.29                           | 2.66 | 0.02 | 0.32 | 2.33  | 2.45              | 3.17             | 0.17                          | -               | 0.17                          | 0.55                          | -    | -                 | -                 | =    | 98.46  | 90.2 | 873  |
| 7/2                                                                                                                                               | «                      | 71.60            | 0.33             | 13.75                          | 0.26                           | 2.33 | 0.05 | 0.73 | 1.54  | 2.53              | 5.31             | 0.05                          | 0.33            | -                             | 0.73                          | 0.04 | 0.005             | 0.014             | 0.15 | 99.75  | 78.0 | 884  |
| 706/2                                                                                                                                             | «                      | 71.68            | 0.18             | 14.04                          | 0.06                           | 2.69 | 0.03 | 0.28 | 1.40  | 3.24              | 4.38             | 0.06                          | -               | 0.10                          | 1.23                          | 0.07 | 0.007             | 0.015             | 0.05 | 99.41  | 90.8 | 801  |
| 708/2                                                                                                                                             | diorite<br>porphyrite  | 59.12            | 0.87             | 16.91                          | 1.42                           | 5.42 | 0.08 | 3.12 | 4.06  | 2.34              | 2.40             | 0.26                          | 0.05            | 0.39                          | 3.12                          | 0.14 | 0.013             | 0.012             | -    | 99.33  | 68.7 | 1056 |
| 706/3                                                                                                                                             | granite-<br>porphyry   | 73.26            | 0.15             | 14.19                          | 1.28                           | 0.29 | 0.07 | 0.21 | 0.28  | 1.30              | 5.46             | 0.11                          | 0.15            | 0.09                          | 2.09                          | 0.04 | 0.003             | 0.016             | 0.05 | 98.95  | 88.2 | 960  |
| 142                                                                                                                                               | trachydolerites        | 45.57            | 1.92             | 13.64                          | 3.38                           | 9.20 | 0.25 | 8.28 | 9.20  | 3.00              | 1.77             | 0.44                          | -               | -                             | 2.57                          | 0.18 | 0.0099            | 0.027             | 0.20 | 99.92  | 60.3 | 1150 |
| 138                                                                                                                                               | «                      | 45.91            | 2.13             | 13.74                          | 3.01                           | 8.13 | 0.26 | 7.59 | 11.16 | 2.20              | 2.25             | 0.22                          | -               | -                             | 3.44                          | 0.28 | 0.0137            | 0.019             | 0.20 | 100.52 | 59.5 | 1150 |
| Dikes and fractured bodies of the the area betweenIstekh and Porphyritic Dikes and fractured bodies of the the area betweenIstekh and Porphyritic |                        |                  |                  |                                |                                |      |      |      |       |                   |                  |                               |                 |                               |                               |      |                   |                   |      |        |      |      |
| 195/2                                                                                                                                             | syenite-porphyre       | 63.37            | 0.50             | 15.92                          | 0.67                           | 3.12 | 0.14 | 0.81 | 1.94  | 7.59              | 4.73             | 0.31                          | 0               | 0.10                          | 0.40                          | 0.08 | 0.005             | 0.0139            | 0.03 | 99.63  | 83.9 | 1032 |
| 722/3                                                                                                                                             | granite-<br>porphyry   | 70.24            | 0.25             | 13.99                          | 0.01                           | 2.48 | 0.06 | 0.42 | 1.54  | 3.24              | 5.00             | 0.08                          | 0.81            | 0.27                          | 0.78                          | 0.04 | 0.01              | 0.026             | 0.10 | 99.08  | 85.6 | 1003 |
| 730/3                                                                                                                                             | «                      | 73.90            | 0.11             | 12.93                          | 0.76                           | 0.90 | 0.02 | 0.04 | 0.77  | 2.74              | 5.68             | 0.02                          | 0.15            | 0.37                          | 0.74                          | 0.01 | 0.005             | 0.020             | 0.10 | 98.90  | 97.6 | 936  |
| 725/1                                                                                                                                             | rhyolite-porphy-<br>ry | 75.52            | 0.18             | 13.53                          | 0.70                           | 1.99 | 0.05 | 0.10 | 0.10  | 0.82              | 4.99             | 0.04                          | 0               | 0.24                          | 0.91                          | 0.15 | 0.0062            | 0.0187            | 0.01 | 99.12  | 96.4 | 981  |
| 728/1                                                                                                                                             | granite-<br>porphyry   | 75.72            | 0.03             | 13.33                          | 0.28                           | 0.80 | 0.02 | 0.03 | 0.27  | 3.34              | 5.74             | 0.03                          | 0               | 0.23                          | 0.80                          | 0.13 | 0.014             | 0.013             | 0.01 | 100.56 | 97.3 | 692  |
| 260/5                                                                                                                                             | «                      | 77.30            | 0.15             | 12.60                          | 0.59                           | 0.86 | 0.03 | 0.50 | 0.50  | 2.69              | 4.38             | 0.02                          | 0               | -                             | 1.31                          | 0.04 | 0.004             | 0.017             | 0.10 | 101.09 | 74.4 | 971  |
| 264/4                                                                                                                                             | rhyolite-porphy-<br>ry | 76.06            | 0.10             | 12.69                          | 0.76                           | 1.08 | 0.02 | 0.10 | 0.14  | 2.71              | 4.21             | 0.01                          | 0.55            | 0.27                          | -                             | 0.04 | 0.002             | 0.012             | 0.14 | 98.62  | 94.8 | 927  |
| 637/2                                                                                                                                             | «                      | 75.04            | 0.21             | 13.62                          | 0.01                           | 2.01 | 0.06 | 0.32 | 0     | 1.35              | 5.87             | 0.03                          | 0               | -                             | 0.80                          | 0.14 | 0.004             | 0.024             | 0.18 | 99.67  | 86.3 | 992  |

Notes: The analyzes were performed at IGABM SB RAS – analysts of D. A. Kulagina, G. N. Okhlopkova, S. E. Diakonova.: H<sub>2</sub>O not included in the amount. Melt temperature by [49], for trachidolerites by [50]
