# Supplementary material
Source: MDPI journal article supplement (https://www.mdpi.com/2075-163X/11/3/266)
Supplement: s1 [file s1]

**Table S2.** Contents of major (wt.%) elements in biotites of the magmatic rocks of Kuranakh. Elikchan and Istekh ore fields.

| Ore Fields                     | Kuranakh Ore Field   |                                  |        |                  |       |                |                       |               | Elikchan Ore Field |         |                                  |                 |        |                       |                         |        |        |        |
|--------------------------------|----------------------|----------------------------------|--------|------------------|-------|----------------|-----------------------|---------------|--------------------|---------|----------------------------------|-----------------|--------|-----------------------|-------------------------|--------|--------|--------|
| Rocks                          | Grano<br>diorit<br>e | Amphibole-<br>Biotite<br>Granite |        | Biotite Granites |       | Pegma-<br>tite | Rhyolite-<br>Porphyry | Granodiorites |                    |         | Amphibo<br>le-Biotite<br>Granite | Biotite Granite |        | Rhyolite-<br>Porphyry | Rhyodacite-<br>Porphyry |        |        |        |
| Sample                         | 1213/6               | 1213/2                           |        | O168             |       | 1211/5         | T632/6                | T635/3        | O196/11            | O196/12 | K11/1                            | K27/11          | K16/5  |                       | T637/2                  |        | O265/1 |        |
| SiO <sub>2</sub>               | 35.69                | 36.30                            | 36.88  | 36.67            | 36.30 | 35.90          | 37.79                 | 34.32         | 36.17              | 37.08   | 36.40                            | 36.28           | 32.78  | 32.68                 | 34.76                   | 34.54  | 37.52  | 34.77  |
| TiO <sub>2</sub>               | 3.51                 | 4.61                             | 4.46   | 3.54             | 3.47  | 4.22           | 2.94                  | 4.02          | 4.62               | 4.93    | 4.81                             | 5.53            | 3.76   | 3.69                  | 2.41                    | 3.11   | 4.98   | 3.84   |
| Al <sub>2</sub> O <sub>3</sub> | 12.73                | 13.46                            | 13.73  | 15.25            | 15.40 | 12.09          | 11.98                 | 13.30         | 13.48              | 13.23   | 13.02                            | 14.07           | 18.32  | 18.16                 | 17.53                   | 17.21  | 12.90  | 15.76  |
| Cr <sub>2</sub> O <sub>3</sub> | 0.02                 | 0.                               | 0.06   | 0.05             | 0     | 0              | 0.01                  | 0.03          | 0.01               | 0.04    | 0.14                             | 0               | 0      | 0.02                  | 0.01                    | 0.06   | 0.11   | 0      |
| Fe <sub>2</sub> O <sub>3</sub> | 2.41                 | 1.60                             | 1.69   | 1.50             | 1.70  | 2.99           | 3.05                  | 2.73          | 1.58               | 1.18    | 1.55                             | 1.22            | 1.77   | 1.79                  | 2.00                    | 1.56   | 1.60   | 2.09   |
| FeO                            | 16.89                | 17.56                            | 17.19  | 19.48            | 20.95 | 22.65          | 15.07                 | 18.90         | 16.39              | 16.71   | 17.29                            | 13.24           | 26.60  | 27.33                 | 21.60                   | 21.91  | 17.29  | 21.54  |
| MnO                            | 0.28                 | 0.24                             | 0.22   | 0.32             | 0.25  | 0.32           | 0.26                  | 0.22          | 0.06               | 0.28    | 0.13                             | 0.14            | 0.30   | 0.29                  | 0.26                    | 0.31   | 0.29   | 0.28   |
| MgO                            | 12.60                | 12.50                            | 12.20  | 6.97             | 6.57  | 6.42           | 13.77                 | 10.47         | 12.76              | 12.55   | 11.02                            | 13.83           | 2.44   | 2.55                  | 6.65                    | 7.00   | 10.85  | 7.27   |
| CaO                            | 0                    | 0.02                             | 0.02   | 0.05             | 0.02  | 0              | 0.51                  | 0             | 0                  | 0.03    | 0.01                             | 0.04            | 0.05   | 0.04                  | 0.02                    | 0      | 0.01   | 0.02   |
| Na <sub>2</sub> O              | 0.21                 | 0.08                             | 0.16   | 0.10             | 0.04  | 0.05           | 0.14                  | 0.28          | 0.14               | 0.06    | 0.04                             | 0.61            | 0.18   | 0.02                  | 0.09                    | 0.16   | 0.09   | 0.32   |
| K <sub>2</sub> O               | 10.08                | 9.73                             | 9.51   | 9.80             | 9.75  | 9.74           | 8.99                  | 9.36          | 9.68               | 9.91    | 9.61                             | 9.14            | 9.75   | 9.64                  | 9.38                    | 10.09  | 9.24   | 9.58   |
| H <sub>2</sub> O               | 3.64                 | 3.74                             | 3.77   | 3.36             | 3.40  | 3.62           | 2.87                  | 3.59          | 3.69               | 3.79    | 2.76                             | 3.42            | 3.30   | 3.42                  | 3.60                    | 3.53   | 3.85   | 3.57   |
| F                              | 0.35                 | 0.33                             | 0.32   | 0.82             | 0.68  | 0.68           | 2.01                  | 0.25          | 0.19               | 0.20    | 0.24                             | 1.05            | 0.33   | 0.09                  | 0.09                    | 0.29   | 0.10   | 0.19   |
| Cl                             | 0.30                 | 0.35                             | 0.35   | 0.55             | 0.58  | 0.74           | 0.48                  | 0.28          | 0.67               | 0.56    | 0.37                             | 0.31            | 1.16   | 1.13                  | 0.78                    | 0.77   | 0.31   | 0.75   |
| Li <sub>2</sub> O              | 0.69                 | 0.87                             | 1.03   | 0.97             | 0.87  | 0.75           | 1.17                  | 0.30          | 0.83               | 1.09    | 1.31                             | 0.86            | 0      | 0                     | 0.42                    | 0.36   | 1.22   | 0.43   |
| O=F,Cl                         | 0.21                 | 0.22                             | 0.21   | 0.46             | 0.42  | 0.45           | 0.95                  | 0.17          | 0.23               | 0.21    | 0.24                             | 0.51            | 0.40   | 0.29                  | 0.21                    | 0.30   | 0.11   | 0.25   |
| Σ                              | 99.18                | 101.0                            | 101.21 | 98.77            | 99.39 | 99.42          | 99.34                 | 97.61         | 99.88              | 101.55  | 101.14                           | 99.11           | 100.16 | 100.38                | 99.19                   | 100.45 | 100.09 | 100.16 |
| Si                             | 5.52                 | 5.47                             | 5.51   | 5.68             | 5.63  | 5.71           | 5.68                  | 5.44          | 5.49               | 5.53    | 5.64                             | 5.44            | 5.74   | 5.23                  | 5.43                    | 5.36   | 5.65   | 5.41   |
| Al <sup>4+</sup>               | 2.32                 | 2.39                             | 2.42   | 2.32             | 2.37  | 2.27           | 2.15                  | 2.49          | 2.41               | 2.32    | 2.25                             | 2.49            | 2.76   | 2.77                  | 2.57                    | 2.64   | 2.29   | 2.59   |
| Al <sup>6+</sup>               | 0                    | 0                                | 0      | 0.46             | 0.44  | 0              | 0                     | 0             | 0                  | 0       | 0                                | 0               | 0.70   | 0.65                  | 0.66                    | 0.51   | 0      | 0.30   |
| Ti                             | 0.52                 | 0.52                             | 0.50   | 0.41             | 0.41  | 0.51           | 0.34                  | 0.48          | 0.53               | 0.55    | 0.65                             | 0.65            | 0.45   | 0.44                  | 0.28                    | 0.36   | 0.56   | 0.45   |
| Cr                             | 0                    | 0                                | 0.01   | 0.01             | 0     | 0              | 0                     | 0             | 0                  | 0       | 0.02                             | 0               | 0      | 0                     | 0                       | 0.01   | 0.01   | 0      |
| Fe <sup>3+</sup>               | 0.28                 | 0.18                             | 0.19   | 0.17             | 0.20  | 0.36           | 0.35                  | 0.32          | 0.18               | 0.14    | 0.12                             | 0.14            | 0.21   | 0.21                  | 0.23                    | 0.18   | 0.18   | 0.23   |
| Fe <sup>2+</sup>               | 2.21                 | 2.21                             | 2.15   | 2.52             | 2.72  | 3.01           | 1.91                  | 2.51          | 2.08               | 2.12    | 2.36                             | 1.65            | 3.56   | 3.66                  | 2.83                    | 2.88   | 2.18   | 2.85   |
| Mn                             | 0.04                 | 0.03                             | 0.03   | 0.04             | 0.03  | 0.04           | 0.03                  | 0.03          | 0.01               | 0.04    | 0.02                             | 0.02            | 0.04   | 0.04                  | 0.03                    | 0.04   | 0.04   | 0.04   |
| Mg                             | 2.49                 | 2.81                             | 2.72   | 1.61             | 1.52  | 1.52           | 3.12                  | 2.48          | 2.88               | 2.79    | 2.17                             | 3.09            | 0.58   | 0.61                  | 1.55                    | 1.62   | 2.44   | 1.69   |
| Li                             | 0.43                 | 0.52                             | 0.62   | 0.60             | 0.54  | 0.48           | 0.71                  | 0.19          | 0.50               | 0.65    | 0.78                             | 0.52            | 0      | 0                     | 0.27                    | 0.23   | 0.74   | 0.27   |
| Ca                             | 0                    | 0                                | 0      | 0.01             | 0     | 0              | 0                     | 0             | 0                  | 0.01    | 0                                | 0.01            | 0.01   | 0.01                  | 0                       | 0      | 0      | 0      |
| Na                             | 0.05                 | 0.02                             | 0.05   | 0.03             | 0.01  | 0.02           | 0.04                  | 0.09          | 0.04               | 0.02    | 0.03                             | 0.18            | 0.06   | 0.01                  | 0.03                    | 0.05   | 0.03   | 0.10   |
| K                              | 1.98                 | 1.87                             | 1.01   | 1.94             | 1.93  | 1.98           | 1.74                  | 1.89          | 1.87               | 1.88    | 1.88                             | 1.75            | 1.99   | 1.97                  | 1.87                    | 2.00   | 1.78   | 1.90   |
| OH                             | 3.75                 | 3.75                             | 3.76   | 3.47             | 3.51  | 3.46           | 2.91                  | 3.80          | 3.74               | 3.76    | 3.74                             | 3.42            | 3.52   | 3.65                  | 3.75                    | 3.66   | 3.87   | 3.71   |

|                          |       |       |       |       |       |       |       |       |       |       |       |       |       |       |       |       |       |       |
|--------------------------|-------|-------|-------|-------|-------|-------|-------|-------|-------|-------|-------|-------|-------|-------|-------|-------|-------|-------|
| F                        | 0.17  | 0.16  | 0.15  | 0.40  | 0.33  | 0.34  | 0.97  | 0.12  | 0.09  | 0.09  | 0.12  | 0.50  | 0.17  | 0.05  | 0.04  | 0.14  | 0.05  | 0.09  |
| Cl                       | 0.08  | 0.09  | 0.09  | 0.11  | 0.15  | 0.20  | 0.12  | 0.08  | 0.17  | 0.14  | 0.15  | 0.08  | 0.32  | 0.31  | 0.21  | 0.20  | 0.08  | 0.20  |
| Σ                        | 20.10 | 20.02 | 20.01 | 19.78 | 19.79 | 19.80 | 20.13 | 19.92 | 19.99 | 20.04 | 19.93 | 19.94 | 19.61 | 19.61 | 19.75 | 19.87 | 19.90 | 19.83 |
| Fe <sup>2</sup> /(Fe+Mg) | 46.2  | 46.1  | 46.3  | 62.6  | 65.8  | 68.9  | 42.1  | 53.4  | 43.9  | 44.3  | 48.8  | 36.8  | 86.8  | 86.4  | 66.4  | 65.1  | 49.2  | 64.4  |
| Al/(Al + Si)             | 17.6  | 18.3  | 18.6  | 21.8  | 21.9  | 18.1  | 16.2  | 18.8  | 18.5  | 18.1  | 18.3  | 19.4  | 26.4  | 26.1  | 24.3  | 23.9  | 18.0  | 22.1  |
| T°C                      | 717   | 750   | 747   | 698   | 689   | 720   | 703   | 725   | 752   | 761   | 754   | 702   | 696   | 692   | 628   | 671   | 756   | 703   |
| P, kb.                   | 1.41  | 1.32  | 1.20  | 0.32  | 2.04  | 1.11  | 0.26  | 1.62  | 1.26  | 1.17  | 0.95  | 1.23  | 3.83  | 3.74  | 3.08  | 2.92  | 0.80  | 2.11  |
| Log f O <sub>2</sub>     | -13.5 | -12.9 | -13.5 | -15.8 | -16.2 | -16.0 | -12.8 | -15.0 | -11.7 | -13.3 | -14.0 | -11.5 | -17.7 | -17.7 | -16.4 | -16.2 | -14.2 | -16.1 |
| Log f H <sub>2</sub> O   | 3.22  | 2.7   | 2.9   | 2.3   | 2.2   | 2.95  | 3.8   | 2.6   | 3.3   | 3.54  | 3.17  | 2.9   | 2.6   | 2.7   | 1.5   | 1.5   | 2.9   | 2.0   |
| Log f HF                 | -0.84 | -0.86 | -0.85 | -1.08 | -1.3  | -0.53 | 0.65  | -1.45 | -0.6  | -0.49 | -0.84 | -0.2  | -2.9  | -3.5  | -2.89 | -2.27 | -2.4  | -1.9  |
| Log f HCl                | 2.91  | 3.38  | 3.19  | 1.9   | 1.7   | 2.63  | 4.3   | 2.2   | 4.26  | 3.86  | 3.09  | 3.8   | 0.05  | -1.7  | 1.03  | 1.25  | 2.97  | 1.76  |

| Ore Fields                     | Istekh Ore Field   |       |               |        |                  |       |        |                  | Dikes and Fractured Bodies of the the Area between Istekh and Porphyritic |              |        |           |        |                |        |        |        |        |       |
|--------------------------------|--------------------|-------|---------------|--------|------------------|-------|--------|------------------|---------------------------------------------------------------------------|--------------|--------|-----------|--------|----------------|--------|--------|--------|--------|-------|
| Rocks                          | Diorite Porphyrite |       | Granodiotites |        | Biotite Granites |       | Rhyoli | Granite-Porphyry |                                                                           | Leucogranite |        | Pegmatite |        | Trachydolerite |        |        |        |        |       |
| sample                         | T708/2             |       | K2A           | T704/6 | T705/2           | K7/2  |        | 725/1            | T726/1                                                                    | T728/1       | O267/4 |           | T721/1 | T731/4         | T639/6 | T639/5 |        |        |       |
| SiO <sub>2</sub>               | 34,45              | 34,60 | 38,52         | 38,11  | 35,18            | 37,01 | 36,58  | 35,67            | 35,12                                                                     | 36,67        | 35,25  | 33,90     | 36,62  | 36,22          | 35,48  | 35,41  | 36,86  | 37,14  | 35,13 |
| TiO <sub>2</sub>               | 5,11               | 1,78  | 2,99          | 4,79   | 5,67             | 3,62  | 3,68   | 4,77             | 3,11                                                                      | 4,57         | 8,21   | 3,44      | 2,58   | 5,44           | 3,71   | 2,99   | 5,16   | 4,19   | 4,69  |
| Al <sub>2</sub> O <sub>3</sub> | 16,93              | 13,32 | 14,92         | 13,31  | 12,78            | 12,99 | 14,33  | 13,09            | 14,08                                                                     | 13,77        | 15,71  | 13,55     | 15,26  | 13,28          | 14,34  | 13,72  | 13,37  | 13,69  | 13,28 |
| Cr <sub>2</sub> O <sub>3</sub> | 0,03               | 0,08  | 0,08          | 0,08   | 0,08             | 0,02  | 0      | 0,06             | 0,06                                                                      | 0,01         | 0,04   | 0,05      | 0,01   | 0,08           | 0,05   | 0      | 0,01   | 0,02   | 0,10  |
| Fe <sub>2</sub> O <sub>3</sub> | 0,60               | 3,19  | 1,24          | 1,03   | 2,20             | 3,06  | 2,74   | 1,67             | 2,89                                                                      | 1,56         | 0,44   | 23,17     | 3,50   | 1,88           | 2,48   | 3,05   | 1,38   | 2,01   | 1,77  |
| FeO                            | 17,01              | 16,56 | 12,88         | 14,07  | 20,61            | 25,18 | 26,06  | 17,08            | 23,39                                                                     | 17,77        | 21,72  | 24,38     | 27,20  | 20,33          | 23,14  | 23,41  | 15,88  | 16,48  | 17,88 |
| MnO                            | 0,27               | 0,21  | 0,10          | 0,55   | 0,41             | 0,42  | 0,19   | 0,21             | 0,37                                                                      | 0,24         | 0,22   | 0,58      | 0,48   | 0,44           | 0,36   | 0,39   | 0,26   | 0,25   | 0,33  |
| MgO                            | 11,32              | 11,49 | 15,21         | 13,10  | 7,82             | 4,56  | 2,71   | 11,74            | 5,85                                                                      | 10,82        | 5,73   | 4,17      | 3,33   | 8,33           | 6,30   | 6,22   | 12,92  | 12,38  | 11,84 |
| CaO                            | 0,21               | 0     | 0,03          | 0,07   | 0,05             | 0     | 0      | 0,11             | 0,09                                                                      | 0,02         | 0,16   | 0,02      | 0,06   | 0,03           | 0,21   | 0,08   | 0,03   | 0,11   | 0,03  |
| Na <sub>2</sub> O              | 0,21               | 0,18  | 0,13          | 0,16   | 0,22             | 0,04  | 0,21   | 0,06             | 0,08                                                                      | 0,08         | 0,06   | 0,15      | 0,07   | 0,31           | 0,11   | 0,04   | 0,22   | 0,15   | 0,17  |
| K <sub>2</sub> O               | 8,99               | 9,84  | 9,68          | 9,31   | 8,85             | 9,66  | 10,01  | 9,53             | 9,74                                                                      | 9,46         | 9,36   | 9,58      | 8,88   | 9,39           | 9,76   | 9,71   | 9,38   | 8,87   | 9,88  |
| H <sub>2</sub> O               | 3,71               | 5,33  | 3,37          | 3,66   | 3,47             | 2,40  | 1,60   | 3,67             | 3,27                                                                      | 3,78         | 3,76   | 3,37      | 2,10   | 3,53           | 3,44   | 3,38   | 3,74   | 3,71   | 3,63  |
| F                              | 0,11               | 0,15  | 0,81          | 0,59   | 0,28             | 0,70  | 1,02   | 0,26             | 0,54                                                                      | 0,13         | 0,37   | 0,01      | 0,018  | 0,31           | 0,43   | 0,35   | 0,39   | 0,45   | 0,30  |
| Cl                             | 0,78               | 0,48  | 1,52          | 0,43   | 0,79             | 0,61  | 0,92   | 0,37             | 0,92                                                                      | 0,42         | 0      | 0,87      | 0,93   | 0,91           | 0,77   | 0,90   | 0,34   | 0,32   | 0,45  |
| Li <sub>2</sub> O              | 0,34               | 0,38  | 1,50          | 1,39   | 0,54             | 1,07  | 0,95   | 0,69             | 0,53                                                                      | 0,97         | 0,56   | 0,18      | 0,96   | 0,84           | 0,63   | 0,61   | 1,03   | 1,11   | 0,53  |
| O=F,Cl                         | 0,22               | 0,17  | 0,68          | 0,35   | 0,30             | 0,43  | 0,64   | 0,19             | 0,43                                                                      | 0,15         | 0,18   | 0,24      | 0,21   | 0,34           | 0,35   | 0,35   | 0,24   | 0,26   | 0,23  |
| Σ                              | 100,16             | 99,78 | 97,20         | 101,18 | 100,28           | 98,44 | 100,60 | 100,09           | 98,63                                                                     | 99,32        | 99,97  | 101,47    | 97,27  | 101,42         | 100,60 | 99,61  | 100,59 | 100,42 | 99,61 |
| Si                             | 5,22               | 5,58  | 5,58          | 5,64   | 5,55             | 5,64  | 5,72   | 5,50             | 5,60                                                                      | 5,56         | 5,34   | 5,59      | 5,65   | 5,56           | 5,55   | 5,62   | 5,51   | 5,56   | 5,42  |
| Al <sup>4+</sup>               | 2,78               | 2,42  | 2,42          | 2,32   | 2,38             | 2,36  | 2,28   | 2,38             | 2,40                                                                      | 2,44         | 2,66   | 2,41      | 2,35   | 2,40           | 2,45   | 2,38   | 2,36   | 2,42   | 2,41  |

|                          |       |       |       |       |       |       |       |       |       |       |       |       |       |       |       |       |       |       |       |
|--------------------------|-------|-------|-------|-------|-------|-------|-------|-------|-------|-------|-------|-------|-------|-------|-------|-------|-------|-------|-------|
| Al <sup>6+</sup>         | 0.25  | 0.11  | 0.13  | 0     | 0     | 0     | 0.37  | 0     | 0.24  | 0.02  | 0.15  | 0.23  | 0.42  | 0     | 0.19  | 0.19  | 0     | 0     | 0     |
| Ti                       | 0.58  | 0.22  | 0.33  | 0.53  | 0.67  | 0.42  | 0.43  | 0.55  | 0.37  | 0.52  | 0.94  | 0.43  | 0.30  | 0.63  | 0.44  | 0.36  | 0.58  | 0.47  | 0.54  |
| Cr                       | 0     | 0.01  | 0.01  | 0.01  | 0.01  | 0     | 0     | 0.01  | 0.01  | 0     | 0.01  | 0.01  | 0     | 0.01  | 0.01  | 0     | 0     | 0     | 0.01  |
| Fe <sup>3+</sup>         | 0.07  | 0.38  | 0.14  | 0.12  | 0.28  | 0.35  | 0.32  | 0.19  | 0.34  | 0.18  | 0.05  | 0.36  | 0.40  | 0.23  | 0.36  | 0.29  | 0.15  | 0.22  | 0.20  |
| Fe <sup>2+</sup>         | 2.15  | 2.26  | 1.56  | 1.74  | 2.70  | 3.21  | 3.41  | 2.21  | 3.12  | 2.25  | 2.75  | 3.44  | 3.52  | 2.60  | 2.96  | 3.03  | 1.99  | 2.07  | 2.31  |
| Mn                       | 0.04  | 0.03  | 0.01  | 0.07  | 0.06  | 0.05  | 0.02  | 0.03  | 0.05  | 0.03  | 0.03  | 0.08  | 0.06  | 0.06  | 0.05  | 0.05  | 0.03  | 0.03  | 0.04  |
| Mg                       | 2.56  | 2.76  | 3.28  | 2.89  | 1.84  | 1.04  | 0.63  | 2.70  | 1.39  | 2.45  | 1.29  | 1.02  | 0.77  | 1.91  | 1.47  | 1.47  | 2.88  | 2.76  | 2.72  |
| Li                       | 0.20  | 0.24  | 0.88  | 0.82  | 0.35  | 0.66  | 0.60  | 0.42  | 0.34  | 0.59  | 0.34  | 0.12  | 0.59  | 0.52  | 0.40  | 0.39  | 0.62  | 0.67  | 0.33  |
| Ca                       | 0.03  | 0     | 0     | 0.01  | 0.01  | 0     | 0     | 0.02  | 0.02  | 0     | 0.03  | 0     | 0.01  | 0.01  | 0.04  | 0.01  | 0.01  | 0.02  | 0.01  |
| Na                       | 0.06  | 0.06  | 0.04  | 0.05  | 0.07  | 0.01  | 0.06  | 0.02  | 0.02  | 0.02  | 0.02  | 0.05  | 0.02  | 0.09  | 0.03  | 0.01  | 0.06  | 0.04  | 0.05  |
| K                        | 1.74  | 2.02  | 1.79  | 1.76  | 1.78  | 1.88  | 2.00  | 1.88  | 1.98  | 1.83  | 1.81  | 2.01  | 1.75  | 1.84  | 1.95  | 1.97  | 1.79  | 1.69  | 1.94  |
| OH                       | 3.75  | 3.79  | 3.25  | 3.61  | 3.65  | 3.50  | 3.25  | 3.78  | 3.48  | 3.83  | 3.80  | 3.71  | 3.75  | 3.61  | 3.58  | 3.58  | 3.73  | 3.71  | 3.74  |
| F                        | 0.05  | 0.08  | 0.37  | 0.28  | 0.14  | 0.34  | 0.50  | 0.12  | 0.27  | 0.06  | 0.18  | 0.05  | 0.01  | 0.15  | 0.21  | 0.18  | 0.18  | 0.21  | 0.14  |
| Cl                       | 0.20  | 0.13  | 0.37  | 0.11  | 0.21  | 0.16  | 0.24  | 0.10  | 0.25  | 0.11  | 0.03  | 0.24  | 0.24  | 0.24  | 0.20  | 0.24  | 0.09  | 0.08  | 0.12  |
| Σ                        | 19.68 | 20.09 | 20.12 | 19.96 | 19.70 | 19.62 | 19.83 | 19.93 | 19.88 | 19.89 | 19.43 | 19.75 | 19.84 | 19.86 | 19.89 | 19.73 | 19.98 | 19.95 | 19.99 |
| Fe <sup>2</sup> /(Fe+Mg) | 46,5  | 48,7  | 34,0  | 39,1  | 61,8  | 77,5  | 85,5  | 47,0  | 71,4  | 49,9  | 97,3  | 78,8  | 83,7  | 59,7  | 69,1  | 70,2  | 42,6  | 45,3  | 48,0  |
| Al/(Al + Si)             | 23,2  | 18,8  | 19,4  | 18,3  | 18,6  | 18,6  | 20,8  | 18,3  | 20,2  | 19,1  | 22,9  | 20,2  | 21,2  | 18,9  | 20,3  | 19,6  | 18,3  | 18,5  | 18,5  |
| T°C                      | 764   | 605   | 719   | 767   | 760   | 688   | 689   | 756   | 671   | 745   | 697   | 687   | 624   | 784   | 695   | 663   | 772   | 736   | 753   |
| P, kb.                   | 2,62  | 1,29  | 1,20  | 0,62  | 1,14  | 0,62  | 1,38  | 1,23  | 1,32  | 1,05  | 1,95  | 1,23  | 1,62  | -1,05 | 1,35  | 1,08  | 1,17  | 1,08  | 1,50  |
| Log f O <sub>2</sub>     | -13,9 | -13,5 | -10,8 | -12,3 | -15,8 | -17,2 | -16,8 | -13,8 | -16,7 | -14,4 | -17   | -17,2 | -17,7 | -15   | -16,6 | -16,6 | -12,9 | -13,2 | -14,0 |
| Log f H <sub>2</sub> O   | 1,5   | 3     | 3     | 3,1   | 2,7   | 2,9   | 2,8   | 2,9   | 2,5   | 2,6   | 2.    | 2,44  | 2,4   | 2,8   | 2,4   | 2,5   | 2,8   | 3,1   | 2,7   |
| Log f HF                 | -2,65 | -1,45 | -0,21 | -0,48 | -1,24 | -0,44 | -0,05 | -1,11 | -1,11 | -1,57 | -0,98 | -1,97 | -2,69 | -0,91 | -1,26 | -1,30 | -0,76 | -0,64 | -0,19 |
| Log f HCl                | 2,17  | 2,97  | 4,73  | 3,71  | 2,50  | 2,13  | 2,31  | 2,99  | 1,96  | 2,75  | 0,20  | 1,60  | 1,63  | 2,99  | 1,95  | 2,06  | 3,43  | 3,23  | 2,92  |

Notes: the analyses were performed at IGABM SB RAS using the Camebax-micro microanalyzer by L.A. Pavlova and S.P. Roev. Determination of temperatures: T [44]; pressure P - [45]; log f O<sub>2</sub> - [46]; log f H<sub>2</sub>O. log f HCl. log f HF by [47], Li<sub>2</sub>O and H<sub>2</sub>O calculations by [48].
